# Supplementary material
Source: MDPI journal article supplement (https://www.mdpi.com/2073-4433/15/5/518)
Supplement: s1 [file s1]

Rok Tomazin, Viktor Švigelj, Andreja Kučec, Janez Mulec and Tadeja Matos

[illegible]

|                          |                 |               |               |               |               |               |           |               |               |           |               |               |           |               |               |               |
|--------------------------|-----------------|---------------|---------------|---------------|---------------|---------------|-----------|---------------|---------------|-----------|---------------|---------------|-----------|---------------|---------------|---------------|
|                          |                 |               |               |               |               |               |           |               |               |           |               |               |           |               |               |               |
|                          |                 |               |               |               |               |               |           |               |               |           |               |               |           |               |               |               |
|                          |                 | /             | /             | /             | 16.2          | 14.1          | 13.7      | 13.2          | 13.1          | 13        | 13.3          | 13.3          | 13.9      | 13.7          | 14.9          | 13.1          |
| Air - velocity<br>(m/s)  | Before patients | 0-0.13        | 0-<br>0.05    | 0-0.01        | 0             | 0-0.01        | 0         | 0             | 0             | 0         | 0-0.1         | 0             | 0-0.01    | 0-<br>0.01    | 0-0.01        | 0             |
|                          |                 | 0.04          | 0.02          | 0.01          | 0             | 0.001         | 0         | 0             | 0             | 0         | 0.002         | 0             | 0.006     | 0.002         | 0.002         | 0             |
|                          | After patients  | /             | /             | /             | 0-0.01        | 0.02-<br>0.32 | 0-0.02    | 0-<br>0.01    | 0-<br>0.01    | 0-0.02    | 0             | 0-<br>0.01    | 0-0.01    | 0-<br>0.02    | 0-0.02        | 0-0.01        |
|                          |                 | /             | /             | /             | 0.001         | 0.123         | 0.009     | 0.002         | 0.001         | 0.002     | 0             | 0.002         | 0.002     | 0.005         | 0.006         | 0.005         |
| Air - flow (L/s)         | Before patients | 0.08-<br>9.44 | 0.08-<br>3.43 | 0.09-<br>0.77 | 0.02-<br>0.32 | 0.05-<br>0.38 | 0.03-0.3  | 0.02-<br>0.16 | 0.01-<br>0.22 | 0.01-0.22 | 0.01-<br>0.77 | 0.04-<br>0.89 | 0.04-0.89 | 0.01-<br>0.68 | 0.01-<br>0.68 | 0-0.36        |
|                          |                 | 2.81          | 1.39          | 0.43          | 0.12          | 0.186         | 0.131     | 0.069         | 0.088         | 0.008     | 0.173         | 0.412         | 0.412     | 0.208         | 0.235         | 0.08          |
|                          | After patients  | /             | /             | /             | 0.04-<br>0.59 | 0             | 0.15-0.64 | 0.02-<br>0.77 | 0.01-<br>0.97 | 0.02-1.25 | 0.03-<br>0.15 | 1-0.4         | 0.02-1.03 | 0.07-<br>1.38 | 0.09-<br>1.71 | 0.06-<br>0.77 |
|                          |                 | /             | /             | /             | 0.2           | 0             | 0.64      | 0.193         | 0.223         | 0.217     | 0.086         | 0.144         | 0.241     | 0.34          | 0.521         | 0.38          |
| Relative<br>humidity (%) | Before patients | 98.5-<br>100  | 57.3-<br>94   | 93.8-<br>98.8 | 60.8-<br>91   | 89.7-<br>96.2 | 96.2-98.3 | 72.2-<br>94   | 89-<br>93.5   | 92.3-95.1 | 69-<br>94.4   | 93.3-<br>98.3 | 98-100    | 68.2-<br>92.6 | 92.1-<br>96.7 | 94.4-<br>99.1 |
|                          |                 | 99.7          | 84.3          | 96.4          | 77.4          | 92.7          | 97.2      | 84.6          | 90.6          | 93.4      | 84.3          | 95.6          | 99.4      | 83.3          | 94.3          | 97.5          |
|                          | After patients  | /             | /             | /             | 59.8-<br>91.8 | 91.7-<br>96.8 | 97-98.9   | 100           | 94-<br>100    | 99.4-100  | 100           | 100           | 100       | 92.7-<br>98.9 | 87.1-<br>93.8 | 100           |
|                          |                 | /             | /             | /             | 78.8          | 93.9          | 97.8      | 100           | 98            | 99.9      | 100           | 100           | 100       | 95.9          | 88.7          | 100           |

Jed. = Jedilnica; Spal. = Spalnica; Tel. = Telovadnica

**Table S2:** Bacterial and fungal isolates (MALDI Score  $\geq 2.00$ ) from the Jedilnica sampling site in Sežana Hospital Cave. Concentrations (CFU/m<sup>3</sup>) and percentages (%) of isolates based on total microbial counts.

[illegible]

|                                      |                 |               |            |           |            |              |           |              |            |              |           |
|--------------------------------------|-----------------|---------------|------------|-----------|------------|--------------|-----------|--------------|------------|--------------|-----------|
| <i>Aerococcus viridans</i>           | After patients  | NP            | NP         | NP        | NP         | NP           | NP        | NP           | NP         | NP           | 17 (2.2)  |
| <i>Bacillus licheniformis</i>        | After patients  | NP            | NP         | NP        | NP         | 4<br>(1.7)   | NP        | NP           | NP         | NP           | NP        |
| <i>Bacillus muralis</i>              | before patients | NP            | NP         | 10 (9.8)  | NP         | NP           | NP        | NP           | NP         | NP           | NP        |
| <i>Bacillus mycoides</i>             | After patients  | NP            | NP         | NP        | NP         | NP           | NP        | NP           | NP         | 6 (1.0)      | NP        |
| <i>Bacillus simplex</i>              | After patients  | NP            | NP         | NP        | NP         | NP           | NP        | 4 (1.9)      | NP         | NP           | NP        |
| <i>Bacillus weihenstephanensis</i>   | Before patients | 6 (1.4)       | NP         | NP        | NP         | NP           | NP        | NP           | NP         | NP           | NP        |
| <i>Brevibacillus borstelensis</i>    | After patients  | NP            | NP         | NP        | NP         | NP           | NP        | NP           | 33 (3.7)   | NP           | NP        |
| <i>Corynebacterium aurimucosum</i>   | Before patients | NP            | NP         | NP        | NP         | NP           | NP        | 6 (5.7)      | NP         | NP           | NP        |
| <i>Corynebacterium minutissimum</i>  | After patients  | NP            | NP         | NP        | NP         | NP           | NP        | NP           | 33 (3.7)   | NP           | NP        |
| <i>Dietzia maris</i>                 | Before patients | NP            | NP         | NP        | NP         | NP           | NP        | NP           | 200 (30.6) | NP           | NP        |
| <i>Enterococcus moraviensis</i>      | Before patients | NP            | NP         | NP        | NP         | NP           | NP        | NP           | NP         | NP           | 17 (11.3) |
| <i>Exiguobacterium</i> sp.           | After patients  | NP            | NP         | NP        | NP         | NP           | NP        | NP           | NP         | NP           | 17 (2.2)  |
| <i>Kocuria marina</i>                | Before patients | NP            | NP         | NP        | NP         | NP           | NP        | 6 (5.7)      | NP         | NP           | NP        |
| <i>Kocuria palustris</i>             | Before patients | NP            | NP         | NP        | NP         | NP           | NP        | NP           | 33 (5.1)   | NP           | NP        |
| <i>Kocuria palustris</i>             | After patients  | NP            | NP         | NP        | NP         | NP           | NP        | NP           | 136 (15.3) | NP           | NP        |
| <i>Kocuria rosea</i>                 | Before patients | NP            | 50 (7.3)   | NP        | NP         | NP           | NP        | NP           | NP         | NP           | NP        |
| <i>Microbacterium phyllosphaerae</i> | After patients  | NP            | NP         | NP        | NP         | NP           | NP        | NP           | NP         | NP           | 33 (4.2)  |
| <i>Micrococcus</i> sp.               | Before patients | 4 (0.9)       | 17 (2.5)   | NP        | NP         | 4 (3.6)      | 17 (34.0) | NP           | NP         | NP           | NP        |
| <i>Micrococcus</i> sp.               | After patients  | NP            | NP         | NP        | NP         | NP           | 167 (4.3) | NP           | NP         | 6 (1.0)      | NP        |
| <i>Micrococcus flavus</i>            | Before patients | NP            | NP         | 10 (9.8)  | 17 (12.7)  | NP           | NP        | NP           | NP         | NP           | NP        |
| <i>Micrococcus flavus</i>            | After patients  | NP            | NP         | 50 (14.1) | 84 (11.1)  | 8 (3.4)      | NP        | NP           | NP         | NP           | 33 (4.2)  |
| <i>Micrococcus luteus</i>            | Before patients | 100<br>(22.6) | 184 (26.9) | 10 (9.8)  | 33 (24.6)  | 4 (3.6)      | NP        | 12<br>(11.3) | NP         | 12<br>(13.6) | 84 (55.6) |
| <i>Micrococcus luteus</i>            | After patients  | NP            | NP         | 60 (16.9) | 200 (26.4) | 24<br>(10.3) | 100 (2.6) | 24<br>(11.2) | 167 (18.8) | 10 (1.6)     | 33 (4.2)  |
| <i>Pantoea agglomerans</i>           | Before patients | NP            | NP         | NP        | NP         | 2 (1.8)      | NP        | NP           | NP         | NP           | NP        |
| <i>Peribacillus simplex</i>          | After patients  | NP            | NP         | NP        | NP         | NP           | NP        | 2 (0.9)      | NP         | 2 (0.3)      |           |
| <i>Pseudarthrobacter oxydans</i>     | Before patients | NP            | NP         | NP        | NP         | NP           | NP        | 6 (5.7)      | NP         | NP           | 17 (11.3) |
| <i>Pseudarthrobacter oxydans</i>     | After patients  | NP            | NP         | NP        | NP         | NP           | NP        |              | 33 (3.7)   | NP           | NP        |
| <i>Pseudomonas gessardii</i>         | After patients  | NP            | NP         | NP        | NP         | NP           | NP        | 8 (3.7)      | NP         | NP           | NP        |

|                                     |                 |          |          |           |           |           |           |          |           |           |            |
|-------------------------------------|-----------------|----------|----------|-----------|-----------|-----------|-----------|----------|-----------|-----------|------------|
| <i>Pseudomonas koreensis</i>        | Before patients | NP       | NP       | 2 (2.0)   | NP        | NP        | NP        | NP       | NP        | NP        | NP         |
| <i>Pseudomonas luteola</i>          | Before patients | 4 (0.9)  | NP       | NP        | NP        | NP        | NP        | NP       | NP        | NP        | NP         |
| <i>Psychrobacter alimentarius</i>   | After patients  |          | NP       | 4 (3.9)   | NP        | NP        | NP        | NP       | NP        | NP        | NP         |
| <i>Rothia dentocariosa</i>          | Before patients | 4 (0.9)  | NP       | NP        | NP        | NP        | NP        | NP       | NP        | NP        | NP         |
| <i>Serratia proteamaculans</i>      | Before patients | NP       | NP       | 4 (3.9)   | 17 (12.7) | NP        | NP        | NP       | NP        | NP        | NP         |
| <i>Serratia proteamaculans</i>      | After patients  | NP       | NP       | 20 (5.6)  | 33 (4.4)  | NP        | NP        | NP       | NP        | NP        | 17 (2.2)   |
| <i>Staphylococcus capitis</i>       | Before patients | 4 (0.9)  | NP       | NP        | NP        | NP        | NP        | NP       | NP        | 12 (13.6) | 33 (21.9)  |
| <i>Staphylococcus chonii</i>        | After patients  | NP       | NP       | NP        | NP        | NP        | NP        | NP       | NP        | NP        | 33 (4.2)   |
| <i>Staphylococcus epidermidis</i>   | Before patients | 10 (2.3) | NP       | NP        | NP        | NP        | NP        | NP       | NP        | 2 (2.3)   | NP         |
| <i>Staphylococcus equorum</i>       | Before patients | 4 (0.9)  | NP       | NP        | NP        | NP        | NP        | NP       | NP        | NP        | NP         |
| <i>Staphylococcus hominis</i>       | Before patients | NP       | NP       | 6 (5.9)   | 17 (12.7) | NP        | NP        | NP       | NP        | 4 (4.5)   | NP         |
| <i>Staphylococcus hominis</i>       | After patients  | NP       | NP       | NP        | NP        | NP        | NP        | NP       | NP        | 44 (7.2)  | NP         |
| <i>Staphylococcus lugdunensis</i>   | After patients  | NP       | NP       | 8 (2.3)   | NP        | NP        | NP        | 14 (6.5) | NP        | NP        | NP         |
| <i>Staphylococcus pettenkoferi</i>  | After patients  | NP       | NP       | NP        | NP        | NP        | NP        | NP       | NP        | NP        | 17 (2.2)   |
| <i>Staphylococcus petrasii</i>      | Before patients | NP       | NP       | 4 (3.9)   | NP        | NP        | NP        | NP       | NP        | NP        | NP         |
| <i>Staphylococcus petrasii</i>      | After patients  | NP       | NP       | NP        | NP        | NP        | NP        | 8 (3.7)  | NP        | NP        | NP         |
| <i>Staphylococcus schleiferi</i>    | After patients  | NP       | NP       | NP        | NP        | NP        | NP        | NP       | NP        | 4 (0.7)   | NP         |
| <i>Staphylococcus warneri</i>       | Before patients | NP       | NP       | NP        | NP        | NP        | NP        | NP       | NP        | 2 (2.3)   | NP         |
| <i>Staphylococcus warneri</i>       | After patients  | NP       | NP       | 10 (2.8)  | 33 (4.4)  | NP        | NP        | NP       | NP        | 8 (1.3)   | NP         |
| <i>Streptomyces badius</i>          | Before patients | NP       | NP       | NP        | NP        | NP        | NP        | NP       | NP        | NP        | NP         |
| <i>Streptomyces lavendulae</i>      | Before patients | 8 (1.8)  | NP       | NP        | NP        | NP        | NP        | NP       | NP        | NP        | NP         |
| <i>Streptomyces violaceoruber</i>   | After patients  | NP       | NP       | NP        | NP        | NP        | 200 (5.2) | NP       | NP        | NP        | NP         |
| <b>Fungi</b>                        |                 |          |          |           |           |           |           |          |           |           |            |
| <i>Aspergillus fumigatus</i>        | Before patients | NP       | NP       | NP        | NP        | NP        | NP        | 2 (1.9)  | NP        | 2 (2.3)   | NP         |
| <i>Cutaneotrichosporon curvatum</i> | After patients  | NP       | NP       | 12 ( 3.4) | NP        | NP        | NP        | NP       | NP        | NP        | NP         |
| <i>Meyerozyma guilliermondii</i>    | After patients  | NP       | NP       |           | 40 (5.3)  | NP        | NP        | NP       | NP        | NP        | NP         |
| <i>Penicillium brevicompactum</i>   | Before patients | 10 (2.3) | 33 (4.8) | 2 (2.0)   | NP        | NP        | NP        | NP       | NP        | NP        | NP         |
| <i>Penicillium chrysogenum</i>      | After patients  | NP       | NP       | NP        | NP        | 80 (34.5) | NP        | NP       | NP        | NP        | 334 (42.6) |
| <i>Penicillium expansum</i>         | Before patients | 6 (1.4)  | 33 (4.8) | NP        | NP        | NP        | NP        | NP       | 84 (12.9) | NP        | NP         |

|                             |                        |     |     |     |          |     |      |     |          |     |     |
|-----------------------------|------------------------|-----|-----|-----|----------|-----|------|-----|----------|-----|-----|
| <i>Penicillium italicum</i> | <i>After patients</i>  | NP  | NP  | NP  | 33 (4.4) | NP  | NP   | NP  | 50 (5.6) | NP  | NP  |
| Total microorganisms        | <i>Before patients</i> | 442 | 684 | 102 | 134      | 112 | 50   | 106 | 653      | 88  | 151 |
| Total microorganisms        | <i>After patients</i>  | 0   | 0   | 354 | 757      | 232 | 3873 | 214 | 886      | 610 | 784 |

SAS - VWR® SAS Super DUO 360 Air Sampler (VWR International, Radnor, PA, USA); Coriolis - Coriolis®µ Cyclonic Air Sampler (Bertin Technologies, Saint Quentin en Yvelines, France); NP – not present

**Table S3:** Bacterial and fungal isolates (MALDI Score  $\geq 2.00$ ) from the Spalnica sampling site in Sežana Hospital Cave. Concentrations (CFU/m<sup>3</sup>) and percentages (%) of isolates based on total microbial counts.

| <b>Spalnica (CFU/m<sup>3</sup> (%))</b> |                              | <b>29.5.2020</b> |                 | <b>7.7.2020</b> |                 | <b>27.11.2021</b> |                 | <b>2.6.2022</b> |                 | <b>10.1.2023</b> |                 |
|-----------------------------------------|------------------------------|------------------|-----------------|-----------------|-----------------|-------------------|-----------------|-----------------|-----------------|------------------|-----------------|
| <b>Bacteria</b>                         | <b>Before/after patients</b> | <b>SAS</b>       | <b>Coriolis</b> | <b>SAS</b>      | <b>Coriolis</b> | <b>SAS</b>        | <b>Coriolis</b> | <b>SAS</b>      | <b>Coriolis</b> | <b>SAS</b>       | <b>Coriolis</b> |
| <i>Achromobacter piechaudii</i>         | <i>Before patients</i>       | NP               | NP              | NP              | NP              | NP                | NP              | NP              | 17 (2.1)        | NP               | NP              |
| <i>Acinetobacter calcoaceticus</i>      | <i>Before patients</i>       | NP               | NP              | NP              | NP              | NP                | NP              | NP              | NP              | NP               | 50 (16.4)       |
| <i>Acinetobacter guillouiae</i>         | <i>After patients</i>        | NP               | NP              | NP              | NP              | NP                | NP              | NP              | NP              | 6 (4.3)          | NP              |
| <i>Acinetobacter lwoffii</i>            | <i>Before patients</i>       | 4 (0.9)          | NP              | 4 (2.8)         | NP              | NP                | NP              | NP              | NP              | NP               | NP              |
| <i>Acinetobacter radioresistens</i>     | <i>After patients</i>        | NP               | NP              | NP              | NP              | NP                | 17 (0.9)        | NP              | NP              | NP               | NP              |
| <i>Advenella incenata</i>               | <i>Before patients</i>       | 18 (3.9)         | 33 (6.4)        | NP              | NP              | NP                | NP              | NP              | NP              | NP               | NP              |
| <i>Aerococcus viridans</i>              | <i>After patients</i>        | NP               | NP              | NP              | NP              | NP                | NP              | NP              | 33 (7.6)        | NP               | NP              |
| <i>Bacillus idriensis</i>               | <i>Before patients</i>       | 10 (2.2)         | 17 (3.3)        | NP              | NP              | NP                | NP              | NP              | NP              | NP               | NP              |
| <i>Bacillus indicus</i>                 | <i>Before patients</i>       | 6 (1.3)          | NP              | NP              | NP              | NP                | NP              | NP              | NP              | NP               | NP              |
| <i>Bacillus pumilus</i>                 | <i>Before patients</i>       | 2 (0.4)          | NP              | NP              | NP              | NP                | NP              | NP              | NP              | NP               | NP              |
| <i>Corynebacterium amycolatum</i>       | <i>Before patients</i>       | 4 (0.9)          | NP              | NP              | NP              | NP                | NP              | NP              | NP              | NP               | NP              |
| <i>Kocuria marina</i>                   | <i>Before patients</i>       | 10 (2.2)         | NP              | NP              | NP              | NP                | NP              | NP              | NP              | NP               | NP              |
| <i>Kocuria palustris</i>                | <i>Before patients</i>       | 6 (1.3)          | NP              | NP              | NP              | NP                | NP              | NP              | NP              | NP               | NP              |
| <i>Kocuria rhizophila</i>               | <i>After patients</i>        | NP               | NP              | NP              | NP              | NP                | NP              | NP              | NP              | 4 (7.4)          | NP              |
| <i>Kocuria rosea</i>                    | <i>Before patients</i>       | 12 (2.6)         | NP              | NP              | NP              | NP                | NP              | 2 (3.1)         | NP              | NP               | NP              |
| <i>Massilia timonae</i>                 | <i>Before patients</i>       | 6 (1.3)          | NP              | NP              | NP              | NP                | NP              | NP              | NP              | NP               | NP              |
| <i>Microbacterium murale</i>            | <i>After patients</i>        | NP               | NP              | NP              | NP              | NP                | NP              | NP              | 17 (3.9)        | NP               | NP              |
| <i>Micrococcus sp.</i>                  | <i>Before patients</i>       | 6 (1.3)          | 33 (6.4)        | NP              | NP              | NP                | 17 (9.2)        | 8 (12.5)        | NP              | NP               | NP              |
| <i>Micrococcus flavus</i>               | <i>Before patients</i>       | NP               | NP              | 10 (6.9)        | 17 (7.8)        | NP                | NP              | NP              | NP              | NP               | NP              |

[illegible]

|                                   |                 |          |          |         |     |     |      |     |     |         |            |
|-----------------------------------|-----------------|----------|----------|---------|-----|-----|------|-----|-----|---------|------------|
| <i>Meyerozyma guilliermondii</i>  | Before patients | NP       | NP       | 4 (2.8) | NP  | NP  | NP   | NP  | NP  | NP      |            |
| <i>Meyerozyma guilliermondii</i>  | After patients  | NP       | NP       | NP      | NP  | NP  | NP   | NP  | NP  | NP      | 100 (10.5) |
| <i>Penicillium brevicompactum</i> | Before patients | 14 (3.0) | 50 (9.7) | NP      | NP  | NP  | NP   | NP  | NP  | NP      | 33 (10.6)  |
| <i>Penicillium camemberti</i>     | Before patients | 10 (2.2) | NP       | NP      | NP  | NP  | NP   | NP  | NP  | NP      |            |
| <i>Penicillium commune</i>        | Before patients | 12 (2.6) | NP       | NP      | NP  | NP  | NP   | NP  | NP  | NP      | 33 (10.6)  |
| <i>Penicillium digitatum</i>      | Before patients | NP       | NP       | NP      | NP  | NP  | NP   | NP  | NP  | 2 (3.7) | NP         |
| <i>Penicillium expansum</i>       | Before patients | 6 (1.3)  | NP       | NP      | NP  | NP  | NP   | NP  | NP  | NP      | NP         |
| <i>Penicillium italicum</i>       | Before patients | 6 (1.3)  | NP       | NP      | NP  | NP  | NP   | NP  | NP  | 2 (3.7) | NP         |
| Total microorganisms              | Before patients | 464      | 517      | 144     | 217 | 143 | 185  | 64  | 818 | 54      | 304        |
| Total microorganisms              | After patients  | 0        | 0        | 163     | 518 | 185 | 1820 | 218 | 435 | 138     | 951        |

SAS - VWR® SAS Super DUO 360 Air Sampler (VWR International, Radnor, PA, USA); Coriolis - Coriolis® Cyclonic Air Sampler (Bertin Technologies, Saint Quentin en Yvelines, France); NP – not present

**Table S4:** Bacterial and fungal isolates (MALDI Score  $\geq 2.00$ ) from the Telovadnica sampling site in Sežana Hospital Cave. Concentrations (CFU/m<sup>3</sup>) and percentages (%) of isolates based on total microbial counts.

| Telovadnica (CFU/m <sup>3</sup> (%)) |                       | 29.5.2020 |          | 7.7.2020     |          | 27.11.2021   |          | 2.6.2022 |          | 10.1.2023 |          |
|--------------------------------------|-----------------------|-----------|----------|--------------|----------|--------------|----------|----------|----------|-----------|----------|
| Bacteria                             | Before/after patients | SAS       | Coriolis | SAS          | Coriolis | SAS          | Coriolis | SAS      | Coriolis | SAS       | Coriolis |
| <i>Acinetobacter guillouiae</i>      | Before patients       | NP        | NP       | NP           | NP       | NP           | NP       | NP       | NP       | 4 (4.2)   | NP       |
| <i>Acinetobacter johnsonii</i>       | After patients        | NP        | NP       | NP           | NP       | NP           | NP       | NP       | NP       | 4 (0.6)   | NP       |
| <i>Bacillus cereus</i>               | Before patients       | NP        | NP       | NP           | NP       | NP           | NP       | 8 (5.3)  | NP       | NP        | NP       |
| <i>Bacillus cereus</i>               | After patients        | NP        | NP       | NP           | NP       | 2 (1.4)      | NP       | NP       | NP       | NP        | NP       |
| <i>Bacillus megaterium</i>           | After patients        | NP        | NP       | NP           | NP       | NP           | NP       | 2 (1.1)  | NP       | NP        | NP       |
| <i>Bacillus muralis</i>              | before patients       | NP        | NP       | 20<br>(11.8) | NP       |              | NP       | NP       | NP       | NP        | NP       |
| <i>Bacillus subtilis</i>             | Before patients       | NP        | NP       | NP           | NP       | 50<br>(24.8) | NP       | NP       | NP       | NP        | NP       |
| <i>Brachybacterium conglomeratum</i> | Before patients       | NP        | 17 (5.4) | NP           | NP       | NP           | NP       | NP       | NP       | NP        | NP       |
| <i>Brevundimonas diminuta</i>        | Before patients       | NP        | NP       | 33<br>(19.5) | NP       | NP           | NP       | NP       | NP       | NP        | NP       |

[illegible]



|                                     |                 |         |           |              |           |     |      |     |     |         |          |
|-------------------------------------|-----------------|---------|-----------|--------------|-----------|-----|------|-----|-----|---------|----------|
| <i>Cutaneotrichosporon dermatis</i> | After patients  | NP      | NP        | NP           | NP        | NP  | NP   | NP  | NP  | 4 (0.6) | NP       |
| <i>Debaryomyces hansenii</i>        | before patients | NP      | NP        | NP           | 33 (28.8) | NP  | NP   | NP  | NP  | NP      | NP       |
| <i>Meyerozyma guilliermondii</i>    | After patients  | NP      | NP        | 40<br>(20.2) | NP        | NP  | NP   | NP  | NP  | NP      | 33 (3.5) |
| <i>Penicillium brevicompactum</i>   | Before patients | 8 (2.4) | 33 (10.4) | 4 (2.4)      | 17 (14.5) | NP  | NP   | NP  | NP  | 2 (2.1) | NP       |
| Total microorganisms                | Before patients | 334     | 317       | 169          | 117       | 202 | 2370 | 152 | 501 | 96      | 317      |
| Total microorganisms                | After patients  | NP      | NP        | 198          | 469       | 148 | 4558 | 190 | 301 | 650     | 934      |

SAS - VWR® SAS Super DUO 360 Air Sampler (VWR International, Radnor, PA, USA); Coriolis - Coriolis® Cyclonic Air Sampler (Bertin Technologies, Saint Quentin en Yvelines, France); NP – not present

**Table S5:** Bacterial isolates (MALDI Score  $\geq 2.00$ ) from the Jedilnica, Spalnica and Telovadnica sampling sites in the Sežana Hospital Cave, their risk group assignment and typical habitat [29,31]. Concentrations (CFU/m<sup>3</sup>) and percentages (%) of isolates based on the total microbial count per sampling site.

| Bacterial isolates                  | Jedilnica                         |                | Spalnica                          |                | Telovadnica                       |                | Risk Group         | Typical Habitat                                            |
|-------------------------------------|-----------------------------------|----------------|-----------------------------------|----------------|-----------------------------------|----------------|--------------------|------------------------------------------------------------|
|                                     | Bacteria (CFU/m <sup>3</sup> (%)) |                | Bacteria (CFU/m <sup>3</sup> (%)) |                | Bacteria (CFU/m <sup>3</sup> (%)) |                |                    |                                                            |
|                                     | Before patients                   | After patients | Before patients                   | After patients | Before patients                   | After patients |                    |                                                            |
| <i>Acinetobacter calcoaceticus</i>  | NP                                | NP             | NP                                | NP             | 50 (16.3)                         | NP             | 2 (AU, CH, DE)     | Water, soil, animals, humans (intestine)                   |
| <i>Acinetobacter guillouiae</i>     | NP                                | NP             | NP                                | 6 (4.3)        | 4 (4.2)                           | NP             | -                  | Ubiquitous, gasworks, humans (skin)                        |
| <i>Acinetobacter johnsonii</i>      | NP                                | NP             | NP                                | NP             | NP                                | 4 (0.6)        | 2 (AU, C, DE)      | Humans (skin), animals, activated sludge, food             |
| <i>Acinetobacter lwoffii</i>        |                                   | 8 (1.3)        | 4 (2.8)                           | NP             | NP                                | NP             | 2 (AU, CH, DE)     | Ubiquitous, soil, food, humans (skin)                      |
| <i>Acinetobacter radioresistens</i> | NP                                | NP             | NP                                | 17 (0.9)       | NP                                | NP             | -                  | Animals, soil, food                                        |
| <i>Advenella incenata</i>           | NP                                | NP             | 33 (6.9)                          | NP             | NP                                | NP             | -                  | Animals, humans                                            |
| <i>Achromobacter piechaudii</i>     | NP                                | NP             | 17 (2.1)                          | NP             | NP                                | NP             | 2 (CH)             | Soil, plants (tomatoes)                                    |
| <i>Aerococcus viridans</i>          |                                   | 17 (2.2)       | NP                                | 33 (7.6)       | NP                                | NP             | 2 (BE, CH, DE)     | Humans (urinary tract, skin), animals (lobsters), seawater |
| <i>Bacillus cereus</i>              | NP                                | NP             | NP                                | NP             | 8 (5.3)                           | 2 (1.4)        | 2 (AU, CH, DE, UK) | Humans, soil, food                                         |

|                                      |            |            |          |         |           |         |            |                                                    |
|--------------------------------------|------------|------------|----------|---------|-----------|---------|------------|----------------------------------------------------|
| <i>Bacillus idriensis</i>            | NP         | NP         | 17 (3.3) | NP      | NP        | NP      | -          | Soil, plants                                       |
| <i>Bacillus indicus</i>              | NP         | NP         | 6 (1.3)  | NP      | NP        | NP      | -          | Food (probiotic blends)                            |
| <i>Bacillus licheniformis</i>        | NP         | 4 (1.7)    | NP       | NP      | NP        | NP      | -          | Soil, food, animals (birds)                        |
| <i>Bacillus megaterium</i>           | NP         | NP         | NP       | NP      | NP        | 2 (1.1) | -          | Soil, seawater, food, animals (insects)            |
| <i>Bacillus mycoides</i>             | NP         | 6 (1.0)    | NP       | NP      | NP        | NP      | -          | Soil, water, animals (fish, birds)                 |
| <i>Bacillus muralis</i>              | 10 (9.8)   | NP         | NP       | NP      | 20 (11.8) | NP      | -          | Soil. plants. wall paintings                       |
| <i>Bacillus pumilus</i>              | NP         | NP         | 2 (0.4)  | NP      |           | NP      | -          | Soil, animals, food (milk)                         |
| <i>Bacillus simplex</i>              | NP         | 4 (1.9)    |          | NP      |           | NP      | -          | Soil, plants                                       |
| <i>Bacillus subtilis</i>             | NP         | NP         | NP       | NP      | 50 (24.8) | NP      | -          | Soil, plants, animals and humans (intestine)       |
| <i>Bacillus weihenstephanensis</i>   | 6 (1.4)    | NP         | NP       | NP      |           | NP      | -          | Soil, water, food (milk, eggs)                     |
| <i>Brachybacterium conglomeratum</i> | NP         | NP         | NP       | NP      | 17 (5.4)  | NP      | -          | Water, seawater, humans (vagina)                   |
| <i>Brevibacillus borstelensis</i>    | NP         | 33 (3.7)   | NP       | NP      |           | NP      | -          | Water, hot springs, decomposes plastics            |
| <i>Brevundimonas diminuta</i>        | NP         | NP         | NP       | NP      | 33 (19.5) | NP      | -          | Ubiquitous, seawater                               |
| <i>Corynebacterium amycolatum</i>    | 4 (0.9)    | NP         | NP       | NP      |           | NP      | 2 (CH, DE) | Humans (skin)                                      |
| <i>Corynebacterium aurimucosum</i>   | 6 (5.7)    | NP         | NP       | NP      | 12 (3.4)  | NP      | -          | Humans (skin, vagina)                              |
| <i>Dietzia maris</i>                 | 200 (30.6) | NP         | NP       | NP      | NP        | NP      | -          | Humans, animals, seawater                          |
| <i>Enterococcus moraviensis</i>      | 17 (11.3)  | NP         | NP       | NP      | NP        | NP      | -          | Animals (horses, geese, foxes). humans (intestine) |
| <i>Exiguobacterium</i> sp.           |            | 17 (2.2)   | NP       | NP      | NP        | NP      | -          | Water, plants, soil                                |
| <i>Kocuria marina</i>                | 6 (5.7)    |            | 10 (2.2) | NP      | NP        | NP      | -          | Soil, sand, human and animal skin                  |
| <i>Kocuria palustris</i>             | 33 (5.1)   | 136 (15.3) | 6 (1.3)  | NP      | NP        | NP      | -          | Soil, sand, human and animal skin                  |
| <i>Kocuria rhizophila</i>            | NP         | NP         | NP       | 4 (7.4) | NP        | NP      | -          | Soil, sand, human and animal skin                  |
| <i>Kocuria rosea</i>                 | 50 (7.3)   | NP         | 2 (3.1)  | NP      | 6 (3.9)   |         | -          | Soil, sand, human and animal skin                  |
| <i>Massilia timonae</i>              | NP         | NP         | 6 (1.3)  | NP      | 10 (3.0)  |         | -          | Plants (maize), humans                             |

|                                        |           |            |           |           |           |           |                     |                                           |
|----------------------------------------|-----------|------------|-----------|-----------|-----------|-----------|---------------------|-------------------------------------------|
| <i>Microbacterium foliorum</i>         | NP        | NP         | NP        | NP        |           | 10 (5.1)  | -                   | Plants (grass)                            |
| <i>Microbacterium murale</i>           | NP        | NP         | NP        | 17 (3.9)  |           | NP        | -                   | Indoor walls                              |
| <i>Microbacterium oxydans</i>          | NP        | NP         | NP        | NP        | 14 (14.6) | NP        | -                   | Wetland, animals (hamsters – oral mucosa) |
| <i>Microbacterium phyllosphaerae</i>   | NP        | 33 (4.2)   | NP        | NP        | NP        | 17 (1.8)  | -                   | Plants (grass)                            |
| <i>Micrococcus flavus</i>              | 14 (12.7) | 50 (14.1)  | 17 (7.8)  | 33(6.3)   | NP        | NP        | -                   | Plants, soil, sludge                      |
| <i>Micrococcus luteus</i>              | 84 (55.6) | 200 (26.4) | 28 (51.9) | 72 (52.2) | 30 (31.3) | 85 (18.1) | 2 (BE, CH, DE, NIH) | Soil, water, air, human and animal skin   |
| <i>Mixta calida</i>                    | NP        | NP         | 33 (4.0)  | NP        | NP        | NP        |                     | Ubiquitous, plants, food                  |
| <i>Paenibacillus pabuli</i>            | 2 (0.4)   | NP         | NP        | NP        | NP        | NP        |                     | Surfaces (gloves), animals, alcohol       |
| <i>Pantoea agglomerans</i>             | 2 (1.8)   | NP         | NP        | NP        | 2 (2.1)   | NP        | 2 (CH)              | Plants, animals (insects), dust           |
| <i>Peribacillus simplex</i>            | NP        | 2 (0.9)    | NP        | NP        | NP        | NP        | -                   | Soil, plants, water                       |
| <i>Pseudarthrobacter oxydans</i>       | 17 (11.3) | 33 (3.7)   | NP        | NP        | NP        | NP        | -                   | Ubiquitous, plants, water, humans         |
| <i>Pseudarthrobacter sulfonivorans</i> | NP        | NP         | NP        | 33 (17.8) | NP        | NP        | -                   | Soil, plants                              |
| <i>Pseudomonas cedrina</i>             | NP        | NP         | 17 (2.1)  | NP        | NP        | NP        | 2 (AU)              | Water, plants                             |
| <i>Pseudomonas gessardii</i>           | NP        | 8 (3.7)    | NP        | NP        | NP        | NP        | 2 (AU)              | Mineral water, seawater                   |
| <i>Pseudomonas fluorescens</i>         | NP        | NP         | NP        | NP        | 50 (10.0) | NP        | 2 (AU)              | Soil, plants, human, animals              |
| <i>Pseudomonas koreensis</i>           | 2 (2.2)   | NP         | 2 (1.4)   | NP        | NP        | NP        | 2 (AU)              | Soil, plants                              |
| <i>Pseudomonas lutea</i>               |           | NP         |           | 4 (2.0)   | NP        | NP        | 2 (AU)              | Plants, soil                              |
| <i>Pseudomonas luteola</i>             | 4 (0.9)   | NP         |           | NP        | NP        | NP        | 2 (AU, BE, CH, DE)  | Soil, water, damp environments            |
| <i>Pseudomonas synxantha</i>           | NP        | NP         | 17 (7.8)  | 2 (1.2)   | NP        | NP        | 2 (AU)              | Soil, plants, humans, animals             |
| <i>Pseudomonas tolaasii</i>            | NP        | NP         | 2 (1.4)   | NP        | NP        | NP        | 2 (AU)              | Mushrooms                                 |
| <i>Psychrobacter alimentarius</i>      | NP        | NP         | NP        | 4 (3.9)   | NP        | NP        | -                   | Animals (squid), fermented seafood        |
| <i>Rahnella aquatilis</i>              | NP        | NP         | NP        | NP        | 17 (5.4)  | NP        | -                   | Aquatic, plants                           |
| <i>Rothia dentocariosa</i>             | 4 (0.9)   | NP         | NP        | NP        |           | NP        | -                   | Humans (oral mucosa and cavities)         |
| <i>Serratia proteamaculans</i>         |           | NP         | 17 (12.7) | 33 (4.4)  | 84 (10.3) | NP        | 2 (CH, DE)          | Soil, water, seafood                      |
| <i>Staphylococcus capitis</i>          | 33 (21.9) | NP         | 4 (7.4)   | NP        | 4 (4.2)   | NP        | -                   | Animals, humans (skin, scalp)             |

|                                     |           |           |           |           |          |          |                    |                                                                       |
|-------------------------------------|-----------|-----------|-----------|-----------|----------|----------|--------------------|-----------------------------------------------------------------------|
| <i>Staphylococcus cohnii</i>        | NP        | 33 (4.2)  | NP        | NP        | NP       | 17 (5.6) | -                  | Food (milk), animals (cattle), humans (skin)                          |
| <i>Staphylococcus epidermidis</i>   | 10 (2.3)  | NP        | 17 (5.6)  | 16 (11.6) | NP       | NP       | 2 (BE, CH, DE)     | Animals, humans (skin, nasopharynx), fermented sausages               |
| <i>Staphylococcus equorum</i>       | 4 (0.9)   | NP        | NP        | 8 (4.9)   | 17 (5.4) | 17 (3.6) | -                  | Fermented food, animals (horses, cattle)                              |
| <i>Staphylococcus haemolyticus</i>  | NP        | NP        | NP        | 17 (3.9)  | 4 (2.6)  |          | 2 (CH, DE)         | Fermented food, milk, animals (horses, cattle, cats), humans (skin)   |
| <i>Staphylococcus hominis</i>       | 17 (12.7) | 44 (7.2)  | 17 (11.9) | 16 (11.6) | 33 (6.6) | 33 (7.0) | -                  | Fermented food, goat milk, animals (cats, dogs, goats), humans (skin) |
| <i>Staphylococcus lugdunensis</i>   | NP        | 14 (6.5)  | 4 (6.3)   | 85 (16.4) | NP       | NP       | 2 (BE, CH, DE)     | Animals (cats, dogs), humans (skin)                                   |
| <i>Staphylococcus pettenkoferi</i>  | NP        | 17 (2.2)  | NP        | NP        | NP       | NP       | -                  | Humans (skin, urinary tract)                                          |
| <i>Staphylococcus petrasii</i>      | 4 (3.9)   | 8 (3.7)   | NP        | NP        | NP       | NP       | -                  | Humans (skin)                                                         |
| <i>Staphylococcus saprophyticus</i> | NP        | NP        | 4 (2.8)   | NP        | NP       | NP       | 2 (BE, CA, CH, DE) | Animals (horses, cattle), humans (skin)                               |
| <i>Staphylococcus schleiferi</i>    | NP        | 4 (0.7)   | NP        | NP        | NP       | NP       | 2 (BE, CH, DE)     | Animals (dogs, cats), humans (skin)                                   |
| <i>Staphylococcus warneri</i>       | 2 (2.3)   | 33 (4.4)  | NP        | 10 (5.4)  | NP       | NP       | -                  | Fermented food, animals (cats, dogs, horses), humans (skin)           |
| <i>Stenotrophomonas maltophilia</i> | NP        | NP        | 17 (5.6)  | NP        | NP       | NP       | 2 (AU, CH, DE)     | Ubiquitous, water, soil, plants                                       |
| <i>Stenotrophomonas rhizophila</i>  | NP        | NP        | NP        | NP        | NP       | 2 (0.3)  | -                  | Plants, soil                                                          |
| <i>Streptomyces anulatus</i>        | NP        | NP        | NP        | NP        | 17 (5.4) | NP       | -                  | Plants, soil                                                          |
| <i>Streptomyces badius</i>          | NP        | NP        | 17 (5.6)  | NP        | NP       | NP       | -                  | Plants, soil, lake sediments                                          |
| <i>Streptomyces lavendulae</i>      | 8 (1.8)   | NP        | NP        | NP        | NP       | NP       | -                  | Soil                                                                  |
| <i>Streptomyces violaceoruber</i>   | NP        | 200 (5.2) | NP        | NP        | NP       | NP       | -                  | Plants, soil                                                          |

AU – Australia; BE – Belgium; CA – Canada; CH – Switzerland; DE – Germany; NIH – National Institutes of Health; UK – United Kingdom; NP – not present

**Table S6:** Fungal isolates (MALDI Score  $\geq 2.00$ ) from the Jedilnica, Spalnica and Telovadnica sampling sites in the Sežana Hospital Cave, their risk group assignment and typical habitat [27-29,31]. Concentrations (CFU/m<sup>3</sup>) and percentages (%) of isolates based on the total microbial count per sampling site.

| Fungal isolates                     | Jedilnica          |                | Telovadnica        |                | Spalnica           |                | Risk Group             | Typical habitat                                   |
|-------------------------------------|--------------------|----------------|--------------------|----------------|--------------------|----------------|------------------------|---------------------------------------------------|
|                                     | Fungi (CFU/m³ (%)) |                | Fungi (CFU/m³ (%)) |                | Fungi (CFU/m³ (%)) |                |                        |                                                   |
|                                     | Before patients    | After patients | Before patients    | After patients | Before patients    | After patients |                        |                                                   |
| <i>Alternaria alternata</i> *       | NP                 | NP             | NP                 | NP             | 66 (30.4)          | NP             | -                      | Plants, cereals                                   |
| <i>Aspergillus fumigatus</i> *      | 2 (2.3)            | NP             | NP                 | NP             | NP                 | NP             | 2 (AU, CA, CH, DE, EU) | Ubiquitous, air, dust, plants                     |
| <i>Aspergillus versicolor</i> *     | NP                 | NP             | NP                 | NP             | NP                 | 33 (7.6)       | 2 (UK)                 | Ubiquitous, air, dust, plants                     |
| <i>Aureobasidium pullulans</i>      | NP                 | NP             | NP                 | NP             | NP                 | NP             | -                      | Ubiquitous, plants                                |
| <i>Cladosporium</i> sp,*            | 42 (37.5)          | 30 (28.3)      | 10 (9.8)           | NP             | 10 (9.3)20         | NP             | -                      | Plants, air                                       |
| <i>Cutaneotrichosporon curvatum</i> | NP                 | 12 (3.4)       | NP                 | NP             | NP                 | NP             | -                      | Air, water, wood, food                            |
| <i>Cutaneotrichosporon dermatis</i> | NP                 | NP             | NP                 | 33 (3.5)       | NP                 | 4 (0.6)        |                        | Animals, humans                                   |
| <i>Debaryomyces hansenii</i>        | NP                 | NP             | NP                 | NP             | 33 (28.8)          | NP             | -                      | Seawater, fermented food                          |
| <i>Meyerozyma guilliermondii</i>    | NP                 | 40 (5.3)       | 4 (2.8)            | 100 (10.5)     | NP                 | 40 (20.2)      | 2 (EU, UK)             | Seawater, leather, animals, humans (skin, feces)  |
| <i>Penicillium brevicompactum</i> * | 33 (4.8)           | NP             | 33 (10.6)          | NP             | 17 (14.5)          | NP             | -                      | Plants, food (fruit), indoor air                  |
| <i>Penicillium camemberti</i> *     | NP                 | NP             | 10 (2.2)           | NP             | NP                 | NP             | -                      | Food (cheese, sausages)                           |
| <i>Penicillium chrysogenum</i> *    | NP                 | 334 (42.6)     | NP                 | NP             | NP                 | NP             | -                      | Dust, indoor air, damp environments, salted foods |
| <i>Penicillium commune</i> *        | NP                 | NP             | 33 (10.6)          | NP             | NP                 | NP             | -                      | Dust, indoor air, food (cheese, nuts, margarine)  |
| <i>Penicillium digitatum</i> *      | NP                 | NP             | 2 (3.7)            | NP             | NP                 | NP             | -                      | Soil, food (citrus fruits)                        |

---

|                               |           |          |         |    |    |    |   |                            |
|-------------------------------|-----------|----------|---------|----|----|----|---|----------------------------|
| <i>Penicillium expansum</i> * | 84 (12.9) | NP       | 6 (1.3) | NP | NP | NP | - | Plants, food (fruit)       |
| <i>Penicillium italicum</i> * | NP        | 50 (5.6) | 2 (3.7) | NP | NP | NP | - | Soil, food (citrus fruits) |

---

AU – Australia; BE – Belgium; CA – Canada; CH – Switzerland; DE – Germany; EU – European Union; UK – United Kingdom; NP – not present

\* Identification is confirmed by the morphological characteristics of the isolates habitat [27,28].
